# Supplementary material for: A specific amino acid motif of HLA-DRB1 mediates risk and interacts with smoking history in Parkinson’s disease
Source: PubMed Central journal article supplement — Proc Natl Acad Sci U S A. 2019 Mar 25;116(15):7419–24. doi: 10.1073/pnas.1821778116 (PMC6462083; doi:10.1073/pnas.1821778116), 2019-03-25
Supplement: pnas.1821778116.sapp.pdf [file pnas.1821778116.sapp.pdf]

## **SUPPLEMENTARY INFORMATION**

### **Methods**

#### *Details HLA sequencing*

Long range PCR was used to amplify the entire gene from each of the *HLA* class I loci (>200 bp 5'UTR to 3'UTR ~200-400 bp), *HLA-DQA1* (~200 bp of the 5'UTR to ~200 bp of the 3'UTR), and *DQB1* (~70bp of the 5'UTR to ~100 bp of the 3'UTR). For the remaining class II loci specific key regions of the gene were amplified. For *HLA-DPA1*, this coverage was from exon 1 through to exon 4 and for *HLA-DPB1* from exon 2 to exon 4. All *HLA-DRB1/3/4/5* genes were co-amplified in two separate reactions. The coverage for *HLA-DRB1/3/4* loci included ~300-500 bp of the 5'UTR to the first ~270 bp of intron-1 and the end of intron-1 (~250 bp) to exon-6. For the *HLA-DRB5* gene exons 2 to exon 6 were amplified. Each PCR amplification contained 100 ng genomic DNA and a solution of PCR master mix consisting of a cocktail of enzymes, buffers and primers specific for each *HLA* locus. The thermal cycling parameters for all genes were as follows; initial denaturation 94°C/30 sec, followed by 15 cycles at 94°C/1 min 15 sec, 60°C/30 sec, 66°C/7 min 30 sec, followed by 20 cycles at 94°C/30 sec, 60°C/30 sec, 66°C/7 min 30 sec, ending with a final extension step at 66°C for 10 min. PCR's were performed using Veriti Thermal Cyclers (Applied Biosystems/Thermo Fisher Scientific, Waltham, MA, USA). PCR products were quantified using a PicoGreen assay (Invitrogen/Thermo Fisher Scientific, Waltham, MA, USA) using a Victor X plate reader (Perkin Elmer, Waltham, MA, USA). Amplicons for all genes were pooled in optimal molar amounts, and purified using Agencourt AMPure XP beads (Beckman Coulter, Fullerton, CA). Barcoded sample libraries were prepared as follows: enzymatic cleavage into 300 - 500 bp fragments, followed by enzymatic end repair to remove dNTPs overhangs and incorporation of deoxynucleotide dAMP to blunt ended 3' ends, purification using Agencourt AMPure beads, followed by ligation of a unique adaptor indices to each pooled sample. All adaptor ligated samples were pooled into a single tube, purified using

Agencourt AMPure XP beads and DNA fragments were size selected for 400 - 500 bp fragments using the Blue Pippin system (Sage Science, Inc., Beverly, MA, USA). The eluted sample was enriched by a short PCR cycle using Illumina primers that contain adaptor sequences required for binding to the surface of the Illumina flow cell, purified using Agencourt AMPure XP beads and quality checked using the Agilent 2200 TapeStation instrument (Agilent Technologies, Inc., Santa Clara, CA, USA). The library was quantified using the Qubit™ dsDNA BR Assay Kit (ThermoFisher Scientific, Waltham, MA, USA) with the Qubit Fluorometer. The sample was denatured with sodium hydroxide and sequenced at a final concentration of 1.3 pM spiked with 0.2 % phi X on the Illumina NextSeq 500 or MiniSeq instruments using 150 cycle paired-end kits (Illumina, Inc., San Diego, CA, USA).

*HLA* NGS reads were analyzed using the MIA FORA NGS FLEX v3.0 software which employs two complementary strategies: competitive mapping of paired-end NGS reads and *de novo* assembly to construct phased consensus sequences to analyze data and generate genotype calls. Paired-end reads and phased consensus sequences were compared to three sources of *HLA* reference sequences: IPD-IMGT/HLA database v3.24.0 (<http://www.ebi.ac.uk/imgt/hla/>) and internal references generated by cloning and sequencing experiments as well as computationally filled *in silico* *HLA* sequences to find the closest fit. Final genotyping calls were made after manual review.

**Supplementary Table 1. Frequency of HLA alleles in PD cases and controls in the discovery dataset.**

| <b>Locus</b> | <b>Allele</b> | <b>Control</b> | <b>PD</b> |
|--------------|---------------|----------------|-----------|
| A            | 01:01:01:01   | 0.15722        | 0.16218   |
| A            | 01:01:13      | 0              | 0.00031   |
| A            | 01:02         | 0.00062        | 0         |
| A            | 01:03         | 0              | 0.00063   |
| A            | 01:06         | 0.00031        | 0         |
| A            | 01:25         | 0.00031        | 0         |
| A            | 02:01:01:01   | 0.26152        | 0.26299   |
| A            | 02:01:01:03   | 0              | 0.00031   |
| A            | 02:01:01:05   | 0.00062        | 0.00188   |
| A            | 02:01:02      | 0              | 0.00031   |
| A            | 02:01:04      | 0.00062        | 0         |
| A            | 02:01:05      | 0.00031        | 0.00031   |
| A            | 02:01:14Q     | 0.00031        | 0         |
| A            | 02:02:01:01   | 0.00062        | 0.00031   |
| A            | 02:02:01:02   | 0.00031        | 0         |
| A            | 02:05:01      | 0.01214        | 0.01127   |
| A            | 02:06:01:01   | 0.00187        | 0.00188   |
| A            | 02:07:01      | 0.00031        | 0         |
| A            | 02:08         | 0.00031        | 0         |
| A            | 02:09         | 0              | 0.00031   |
| A            | 02:17:02      | 0              | 0.00094   |
| A            | 02:20:01      | 0              | 0.00063   |
| A            | 02:24:01      | 0.00031        | 0.00031   |
| A            | 02:30         | 0.00031        | 0.00031   |
| A            | 02:34         | 0.00031        | 0         |
| A            | 02:36         | 0              | 0.00031   |
| A            | 03:01         | 0              | 0.00031   |
| A            | 03:01:01:01   | 0.1373         | 0.14089   |
| A            | 03:01:01:03   | 0.00125        | 0.00438   |
| A            | 03:01:01:05   | 0.00529        | 0.00376   |
| A            | 03:02:01      | 0.00342        | 0.00219   |
| A            | 11:01:01:01   | 0.07192        | 0.05949   |
| A            | 23:01:01      | 0.01868        | 0.01972   |
| A            | 23:17         | 0              | 0.00031   |
| A            | 24:02:01:01   | 0.07877        | 0.06794   |
| A            | 24:02:01:02L  | 0.00093        | 0         |
| A            | 24:02:01:04   | 0.00311        | 0.0025    |
| A            | 24:02:01:05   | 0.0028         | 0.00407   |
| A            | 24:03:01      | 0.00187        | 0.00157   |
| A            | 24:226:01     | 0.00031        | 0         |
| A            | 24:314        | 0              | 0.00031   |

|   |             |         |         |
|---|-------------|---------|---------|
| A | 24:58:00    | 0.00031 | 0       |
| A | 24:72       | 0       | 0.00031 |
| A | 25:01:01    | 0.0193  | 0.02223 |
| A | 25:03:00    | 0       | 0.00031 |
| A | 26:01:01:01 | 0.03767 | 0.03632 |
| A | 26:01:01:02 | 0       | 0.00063 |
| A | 26:08:00    | 0.00187 | 0.00094 |
| A | 26:17:00    | 0       | 0.00031 |
| A | 26:26:00    | 0.00031 | 0       |
| A | 29:01:01:01 | 0.00342 | 0.00689 |
| A | 29:02:01:01 | 0.03113 | 0.02849 |
| A | 29:02:01:02 | 0.00249 | 0.0025  |
| A | 30:01:01    | 0.01152 | 0.01378 |
| A | 30:02:01:01 | 0.00965 | 0.01033 |
| A | 30:02:01:02 | 0.00031 | 0.00063 |
| A | 30:02:01:03 | 0       | 0.00063 |
| A | 30:04:01    | 0.00093 | 0.00344 |
| A | 31:01:02:01 | 0.02335 | 0.02693 |
| A | 32:01:01    | 0.0411  | 0.03882 |
| A | 33:01:01    | 0.00965 | 0.00845 |
| A | 33:03:01    | 0.00374 | 0.00407 |
| A | 34:02:01    | 0.00093 | 0.00157 |
| A | 36:01:00    | 0       | 0.00031 |
| A | 66:01:01    | 0.00405 | 0.00188 |
| A | 68:01:01:02 | 0.00841 | 0.0072  |
| A | 68:01:02:01 | 0.00218 | 0.0025  |
| A | 68:01:02:02 | 0.01339 | 0.01659 |
| A | 68:01:02:03 | 0.00031 | 0.00031 |
| A | 68:02:01:01 | 0.00716 | 0.00877 |
| A | 68:02:01:03 | 0       | 0.00031 |
| A | 68:03:01    | 0       | 0.00031 |
| A | 68:13:01    | 0       | 0.00031 |
| A | 69:01:00    | 0.00249 | 0.00094 |
| A | 74:01:01    | 0.00031 | 0.00031 |
| B | 07:02:01    | 0.13325 | 0.1268  |
| B | 07:04       | 0.00031 | 0       |
| B | 07:05:01    | 0.00342 | 0.00407 |
| B | 07:06       | 0.00062 | 0.00157 |
| B | 07:09       | 0.00031 | 0       |
| B | 08:01:01    | 0.10243 | 0.11616 |
| B | 13:02:01    | 0.02397 | 0.02379 |
| B | 14:01:01    | 0.00996 | 0.00626 |
| B | 14:02:01:01 | 0.02833 | 0.02974 |
| B | 14:02:01:02 | 0.00031 | 0.00031 |
| B | 15:01:01:01 | 0.05573 | 0.05009 |

|   |             |         |         |
|---|-------------|---------|---------|
| B | 15:01:01:04 | 0.00311 | 0.00438 |
| B | 15:03:01:02 | 0       | 0.00094 |
| B | 15:07:01    | 0.00187 | 0.00063 |
| B | 15:08:01    | 0       | 0.00031 |
| B | 15:09       | 0.00062 | 0       |
| B | 15:10:01    | 0       | 0.00063 |
| B | 15:16:01    | 0.00093 | 0.00063 |
| B | 15:17:01:01 | 0.00498 | 0.0047  |
| B | 15:18:01    | 0.0028  | 0.00282 |
| B | 15:220      | 0.00031 | 0.00063 |
| B | 15:228      | 0.00031 | 0       |
| B | 15:29       | 0.00031 | 0       |
| B | 15:34       | 0.00031 | 0       |
| B | 15:35       | 0.00031 | 0       |
| B | 15:39:01    | 0       | 0.00063 |
| B | 15:50       | 0.00031 | 0       |
| B | 18:01:01:01 | 0.01276 | 0.01378 |
| B | 18:01:01:02 | 0.03425 | 0.03068 |
| B | 18:03       | 0.00062 | 0.00094 |
| B | 18:05       | 0.00031 | 0       |
| B | 18 :78      | 0.00031 | 0       |
| B | 27:02:01    | 0.00467 | 0.00344 |
| B | 27:05:02    | 0.03238 | 0.04352 |
| B | 27:05:03    | 0.00093 | 0.00063 |
| B | 27:05:04    | 0.00031 | 0.00031 |
| B | 27:05:07    | 0       | 0.00031 |
| B | 27:07:01    | 0.00062 | 0.00031 |
| B | 27:09:00    | 0       | 0.00031 |
| B | 27:13:00    | 0.00031 | 0       |
| B | 35:01:01:02 | 0.05853 | 0.05886 |
| B | 35:01:07    | 0.00031 | 0       |
| B | 35:02:01    | 0.0109  | 0.01127 |
| B | 35:03:01    | 0.02024 | 0.01972 |
| B | 35:08:01    | 0.0056  | 0.00532 |
| B | 35:41:00    | 0.00031 | 0.00094 |
| B | 35:42:01    | 0       | 0.00031 |
| B | 37:01:01    | 0.01245 | 0.01691 |
| B | 38:01:01    | 0.02615 | 0.02818 |
| B | 38:09:00    | 0       | 0.00031 |
| B | 39:01:01:03 | 0.00903 | 0.01033 |
| B | 39:05:01    | 0       | 0.00031 |
| B | 39:06:02    | 0.00685 | 0.00407 |
| B | 39:10:01    | 0       | 0.00031 |
| B | 39:24:01    | 0.00031 | 0.00157 |
| B | 39:35:00    | 0.00031 | 0       |

|   |             |         |         |
|---|-------------|---------|---------|
| B | 40:01:02    | 0.04981 | 0.04822 |
| B | 40:02:01    | 0.01401 | 0.01002 |
| B | 40:06:01:02 | 0.00031 | 0       |
| B | 40:32:00    | 0       | 0.00031 |
| B | 41:01:01    | 0.00498 | 0.00595 |
| B | 41:02:01    | 0.00498 | 0.00125 |
| B | 42:01:01    | 0       | 0.00031 |
| B | 42:02:01:02 | 0.00031 | 0.00031 |
| B | 44:02:01:01 | 0.06445 | 0.0717  |
| B | 44:02:01:03 | 0.00996 | 0.01002 |
| B | 44:03:01:01 | 0.04359 | 0.04665 |
| B | 44:03:01:02 | 0.00093 | 0       |
| B | 44:03:02    | 0.00062 | 0.00031 |
| B | 44:03:03    | 0       | 0.00031 |
| B | 44:04:00    | 0.00125 | 0       |
| B | 44:05:01    | 0.00529 | 0.00344 |
| B | 44:23N      | 0       | 0.00031 |
| B | 44:27:01    | 0.00249 | 0.00125 |
| B | 44:29:00    | 0       | 0.00031 |
| B | 45:01:01    | 0.00592 | 0.00564 |
| B | 47:01:01:03 | 0.00311 | 0.00282 |
| B | 47:02:00    | 0.00031 | 0       |
| B | 48:01:01    | 0.0028  | 0.00031 |
| B | 49:01:01    | 0.01868 | 0.01816 |
| B | 50:01:01    | 0.0109  | 0.01221 |
| B | 50:02:00    | 0       | 0.00031 |
| B | 51:01:01:01 | 0.05106 | 0.04258 |
| B | 51:01:07    | 0       | 0.00031 |
| B | 51:05:00    | 0.00062 | 0.00031 |
| B | 51:07:01    | 0.00062 | 0.00031 |
| B | 51:08:01    | 0.00218 | 0.00125 |
| B | 51:09:01    | 0.00062 | 0       |
| B | 51:22:00    | 0.00031 | 0       |
| B | 52:01:01:01 | 0       | 0.00031 |
| B | 52:01:01:02 | 0.01152 | 0.00971 |
| B | 52:01:01:03 | 0       | 0.00031 |
| B | 53:01:01    | 0.00374 | 0.00376 |
| B | 55:01:01    | 0.02179 | 0.01659 |
| B | 55:01:03    | 0.00031 | 0.00094 |
| B | 56:01:01:02 | 0.00187 | 0.0025  |
| B | 56:01:01:03 | 0.00529 | 0.00438 |
| B | 57:01:01    | 0.033   | 0.03851 |
| B | 57:02:01    | 0       | 0.00063 |
| B | 57:03:01    | 0.00093 | 0.00125 |
| B | 57:79N      | 0.00031 | 0       |

|   |             |         |         |
|---|-------------|---------|---------|
| B | 58:01:01:01 | 0.00747 | 0.0072  |
| B | 58:02:00    | 0       | 0.00031 |
| B | 58:02:01    | 0.00031 | 0       |
| B | 73:01:00    | 0       | 0.00094 |
| C | 01:02:01    | 0.03269 | 0.03726 |
| C | 02:02:02:01 | 0.04421 | 0.04383 |
| C | 02:02:02:02 | 0.00218 | 0.00094 |
| C | 02:10       | 0       | 0.00094 |
| C | 03:02:02:01 | 0.0028  | 0.00188 |
| C | 03:02:02:02 | 0.00031 | 0       |
| C | 03:03:01    | 0.05666 | 0.05479 |
| C | 03:03:02    | 0       | 0.00031 |
| C | 03:04:01:01 | 0.06196 | 0.05479 |
| C | 03:04:01:02 | 0.00872 | 0.00814 |
| C | 03:04:02    | 0       | 0.00031 |
| C | 03:08       | 0.00031 | 0       |
| C | 03:44       | 0       | 0.00031 |
| C | 04:01:01:01 | 0.06849 | 0.07451 |
| C | 04:01:01:05 | 0.0165  | 0.01158 |
| C | 04:01:01:06 | 0.02802 | 0.02599 |
| C | 04:09N      | 0.00156 | 0.00063 |
| C | 05:01:01:01 | 0.01276 | 0.01284 |
| C | 05:01:01:02 | 0.06476 | 0.07107 |
| C | 05:01:05    | 0.00031 | 0.00031 |
| C | 05:09:01    | 0.00031 | 0.00031 |
| C | 06:02:01:01 | 0.07192 | 0.08422 |
| C | 06:02:01:02 | 0.00965 | 0.01158 |
| C | 06:02:01:03 | 0.0056  | 0.00501 |
| C | 06:06       | 0.00031 | 0       |
| C | 07:01:01:01 | 0.13979 | 0.15216 |
| C | 07:01:02    | 0.00529 | 0.00532 |
| C | 07:02:01:01 | 0.0137  | 0.01221 |
| C | 07:02:01:03 | 0.13014 | 0.12367 |
| C | 07:04:01    | 0.01681 | 0.01565 |
| C | 07:06       | 0.00062 | 0.00031 |
| C | 07:18       | 0.00498 | 0.00564 |
| C | 07:38:01    | 0       | 0.00031 |
| C | 07 :419     | 0       | 0.00031 |
| C | 07:46       | 0.00031 | 0       |
| C | 07:57       | 0.00062 | 0       |
| C | 08:01:01    | 0.00125 | 0       |
| C | 08:02:01:01 | 0.02677 | 0.02974 |
| C | 08:02:01:02 | 0.01152 | 0.00626 |
| C | 08:03:01    | 0.00125 | 0.00031 |
| C | 08:22       | 0.00031 | 0       |

|      |             |         |         |
|------|-------------|---------|---------|
| C    | 12:02:02    | 0.01152 | 0.01033 |
| C    | 12:03:01:01 | 0.05573 | 0.05448 |
| C    | 12:05       | 0.00031 | 0       |
| C    | 14:02:01    | 0.0137  | 0.00877 |
| C    | 14:03       | 0       | 0.00031 |
| C    | 15:02:01:01 | 0.02117 | 0.01534 |
| C    | 15:02:01:02 | 0.00031 | 0.00094 |
| C    | 15:04:01    | 0.00031 | 0.00031 |
| C    | 15:05:01    | 0       | 0.00094 |
| C    | 15:05:02    | 0.00436 | 0.00689 |
| C    | 15:09       | 0.00031 | 0.00031 |
| C    | 15:13       | 0.00156 | 0       |
| C    | 16:01:01:01 | 0.02802 | 0.0335  |
| C    | 16:02:01    | 0.0056  | 0.0047  |
| C    | 16:04:01    | 0.00218 | 0.00125 |
| C    | 16:85       | 0.00062 | 0       |
| C    | 17:01:01:02 | 0.00031 | 0.00063 |
| C    | 17:01:01:05 | 0.00467 | 0.00532 |
| C    | 17:03       | 0.00529 | 0.00125 |
| C    | 18:02       | 0       | 0.00094 |
| DPA1 | 01:03:01:01 | 0.13169 | 0.1268  |
| DPA1 | 01:03:01:02 | 0.29421 | 0.28272 |
| DPA1 | 01:03:01:03 | 0.099   | 0.09205 |
| DPA1 | 01:03:01:04 | 0.18182 | 0.18096 |
| DPA1 | 01:03:01:05 | 0.11115 | 0.12993 |
| DPA1 | 01:03:04    | 0.00031 | 0       |
| DPA1 | 01:03:05    | 0.00031 | 0.00157 |
| DPA1 | 01:04       | 0.00716 | 0.00532 |
| DPA1 | 01:05       | 0.00062 | 0.00031 |
| DPA1 | 02:01:01    | 0.099   | 0.09768 |
| DPA1 | 02:01:02    | 0.03798 | 0.04508 |
| DPA1 | 02:01:04    | 0.00093 | 0.00407 |
| DPA1 | 02:01:07    | 0.00031 | 0.00031 |
| DPA1 | 02:01:08    | 0.00031 | 0.00031 |
| DPA1 | 02:02:02    | 0.01743 | 0.01315 |
| DPA1 | 02:02:05    | 0.00031 | 0       |
| DPA1 | 02:06       | 0.00685 | 0.00845 |
| DPA1 | 02:07       | 0.00841 | 0.00845 |
| DPA1 | 03:01       | 0.00187 | 0.00282 |
| DPA1 | 04:01       | 0.00031 | 0       |
| DPB1 | 01:01:01    | 0.04639 | 0.05229 |
| DPB1 | 01:01:02    | 0.00093 | 0.00094 |
| DPB1 | 02:01:02    | 0.13605 | 0.13118 |
| DPB1 | 02:01:04    | 0.00062 | 0.00125 |
| DPB1 | 02:02       | 0.00654 | 0.00751 |



|      |             |         |         |
|------|-------------|---------|---------|
| DPB1 | 03:01:01    | 0.08219 | 0.07796 |
| DPB1 | 04:01:01:01 | 0.43244 | 0.43049 |
| DPB1 | 04:01:01:02 | 0.00156 | 0.00031 |
| DPB1 | 04:01:03    | 0.00031 | 0       |
| DPB1 | 04:01:06    | 0       | 0.00031 |
| DPB1 | 04:02:01:01 | 0.02304 | 0.03569 |
| DPB1 | 04:02:01:02 | 0.08686 | 0.09267 |
| DPB1 | 05:01:01    | 0.02055 | 0.01785 |
| DPB1 | 06:01       | 0.01432 | 0.01127 |
| DPB1 | 09:01:01    | 0.00716 | 0.00626 |
| DPB1 | 10:01:01    | 0.0165  | 0.01346 |
| DPB1 | 104:01:00   | 0.01681 | 0.01503 |
| DPB1 | 105:01:00   | 0.00311 | 0.0047  |
| DPB1 | 11:01:01    | 0.01961 | 0.01847 |
| DPB1 | 124:01:00   | 0.00093 | 0.00125 |
| DPB1 | 126:01:00   | 0       | 0.00063 |
| DPB1 | 13:01:01    | 0.01526 | 0.02254 |
| DPB1 | 131:01:00   | 0.00031 | 0       |
| DPB1 | 132:01:00   | 0       | 0.00031 |
| DPB1 | 138:01:00   | 0.00062 | 0.00063 |
| DPB1 | 14:01:01    | 0.01993 | 0.01534 |
| DPB1 | 15:01:01    | 0.00747 | 0.00751 |
| DPB1 | 16:01:01    | 0.00685 | 0.00564 |
| DPB1 | 17:01       | 0.00996 | 0.0119  |
| DPB1 | 18:01       | 0       | 0.00031 |
| DPB1 | 19:01       | 0.00654 | 0.00501 |
| DPB1 | 20:01:01    | 0.00374 | 0.00376 |
| DPB1 | 23:01:01    | 0.00809 | 0.00438 |
| DPB1 | 26:01:02    | 0.00031 | 0       |
| DPB1 | 33:01:00    | 0.00031 | 0       |
| DPB1 | 34:01:00    | 0.00156 | 0.00063 |
| DPB1 | 35:01:01    | 0.00031 | 0       |
| DPB1 | 350:01:00   | 0.00125 | 0.00094 |
| DPB1 | 416:01:00   | 0       | 0.00031 |
| DPB1 | 417:01:00   | 0       | 0.00031 |
| DPB1 | 45:01:00    | 0.00093 | 0       |
| DPB1 | 46:01:01    | 0       | 0.00063 |
| DPB1 | 52:01:00    | 0.00031 | 0       |
| DPB1 | 63:01:00    | 0       | 0.00031 |
| DPB1 | 81:01:00    | 0.00031 | 0       |
| DQA1 | 01:01:01    | 0.09029 | 0.11083 |
| DQA1 | 01:01:02    | 0.01432 | 0.01565 |
| DQA1 | 01:01:03    | 0       | 0.00031 |
| DQA1 | 01:02:01    | 0.13636 | 0.12774 |
| DQA1 | 01:02:01:04 | 0.04701 | 0.04571 |

|      |             |         |         |
|------|-------------|---------|---------|
| DQA1 | 01:02:02    | 0.02148 | 0.01503 |
| DQA1 | 01:02:04    | 0.00031 | 0       |
| DQA1 | 01:03:01:01 | 0.0109  | 0.00783 |
| DQA1 | 01:03:01:02 | 0.05791 | 0.05729 |
| DQA1 | 01:03:01:06 | 0.00031 | 0       |
| DQA1 | 01:04:01    | 0.02397 | 0.02254 |
| DQA1 | 01:04:02    | 0.00125 | 0.00063 |
| DQA1 | 01:05:01    | 0.00841 | 0.00877 |
| DQA1 | 01:05:02    | 0.00031 | 0.00063 |
| DQA1 | 01:07Q      | 0.00031 | 0       |
| DQA1 | 01:10       | 0.00031 | 0.00188 |
| DQA1 | 02:01       | 0.12516 | 0.13056 |
| DQA1 | 03:01:01    | 0.09527 | 0.0789  |
| DQA1 | 03:02       | 0.00934 | 0.00877 |
| DQA1 | 03:03:01    | 0.07908 | 0.06763 |
| DQA1 | 04:01:01    | 0.01899 | 0.02192 |
| DQA1 | 04:01:02:01 | 0.00187 | 0       |
| DQA1 | 04:02       | 0.00093 | 0.00188 |
| DQA1 | 05:01:01:01 | 0.01494 | 0.01785 |
| DQA1 | 05:01:01:02 | 0.09994 | 0.11897 |
| DQA1 | 05:01:02    | 0       | 0.00031 |
| DQA1 | 05:02       | 0       | 0.00031 |
| DQA1 | 05:03       | 0.00156 | 0.00094 |
| DQA1 | 05:05:01    | 0.13138 | 0.12837 |
| DQA1 | 05:05:01:03 | 0.00093 | 0.0025  |
| DQA1 | 05:08       | 0.00031 | 0       |
| DQA1 | 05:09       | 0.00374 | 0.00219 |
| DQA1 | 06:01:01    | 0.00311 | 0.00407 |
| DQB1 | 02:01:01    | 0.11457 | 0.13682 |
| DQB1 | 02:02:01:01 | 0.09247 | 0.09299 |
| DQB1 | 02:05       | 0       | 0.00031 |
| DQB1 | 03:01:01:01 | 0.08126 | 0.07796 |
| DQB1 | 03:01:01:02 | 0.01183 | 0.01002 |
| DQB1 | 03:01:01:03 | 0.10648 | 0.09987 |
| DQB1 | 03:01:04    | 0       | 0.00063 |
| DQB1 | 03:02:01    | 0.10492 | 0.08579 |
| DQB1 | 03:02:02    | 0.00062 | 0       |
| DQB1 | 03:03:02    | 0.01526 | 0.01534 |
| DQB1 | 03:03:02:01 | 0.0274  | 0.03193 |
| DQB1 | 03:04:01    | 0.00187 | 0.00219 |
| DQB1 | 03:05:01    | 0.00125 | 0.00125 |
| DQB1 | 03:09       | 0       | 0.00031 |
| DQB1 | 03:12       | 0.00031 | 0       |
| DQB1 | 03:19       | 0.00249 | 0.00344 |
| DQB1 | 03:22       | 0.00031 | 0.00031 |

|      |             |         |         |
|------|-------------|---------|---------|
| DQB1 | 04:02:01    | 0.02397 | 0.02599 |
| DQB1 | 05:01:01:01 | 0.01463 | 0.01534 |
| DQB1 | 05:01:01:02 | 0.00903 | 0.00939 |
| DQB1 | 05:01:01:03 | 0.0906  | 0.11209 |
| DQB1 | 05:02:01    | 0.02366 | 0.01503 |
| DQB1 | 05:02:07    | 0       | 0.00031 |
| DQB1 | 05:03:01    | 0.02584 | 0.02286 |
| DQB1 | 05:04       | 0.00187 | 0.00219 |
| DQB1 | 05:51       | 0       | 0.00031 |
| DQB1 | 06:01:01    | 0.01059 | 0.00783 |
| DQB1 | 06:01:03    | 0.00031 | 0       |
| DQB1 | 06:02:01    | 0.12671 | 0.12492 |
| DQB1 | 06:03:01    | 0.06258 | 0.0598  |
| DQB1 | 06:04:01    | 0.03456 | 0.03413 |
| DQB1 | 06:07:01    | 0.00031 | 0       |
| DQB1 | 06:09:01    | 0.0137  | 0.01002 |
| DQB1 | 06:09:05    | 0       | 0.00031 |
| DQB1 | 06:11:02    | 0       | 0.00031 |
| DQB1 | 06:16       | 0.00031 | 0       |
| DQB1 | 06:39       | 0.00031 | 0       |
| DRB1 | 01:01:01    | 0.08095 | 0.10175 |
| DRB1 | 01:01:04    | 0.00031 | 0       |
| DRB1 | 01:02:01    | 0.01432 | 0.01597 |
| DRB1 | 01:03       | 0.01245 | 0.01252 |
| DRB1 | 03:01:01    | 0.11613 | 0.13807 |
| DRB1 | 03:02:01    | 0       | 0.00031 |
| DRB1 | 03:04:01    | 0.00031 | 0       |
| DRB1 | 04:01:01    | 0.0906  | 0.07765 |
| DRB1 | 04:02:01    | 0.01526 | 0.01221 |
| DRB1 | 04:03:01    | 0.00778 | 0.00845 |
| DRB1 | 04:04:01    | 0.03394 | 0.02849 |
| DRB1 | 04:05:01    | 0.00592 | 0.00344 |
| DRB1 | 04:06:02    | 0       | 0.00063 |
| DRB1 | 04:07:01    | 0.00965 | 0.01033 |
| DRB1 | 04:08:01    | 0.00685 | 0.00407 |
| DRB1 | 04:10:01    | 0.00031 | 0       |
| DRB1 | 04:11:01    | 0.00031 | 0       |
| DRB1 | 04:51       | 0.00031 | 0       |
| DRB1 | 07:01:01    | 0.1264  | 0.1315  |
| DRB1 | 08:01:01    | 0.00093 | 0       |
| DRB1 | 08:01:03    | 0.0193  | 0.02223 |
| DRB1 | 08:02:01    | 0.00031 | 0.00094 |
| DRB1 | 08:03:02    | 0.0028  | 0.00407 |
| DRB1 | 08:04:01    | 0.00187 | 0.00094 |
| DRB1 | 08:06       | 0       | 0.00063 |

|      |             |         |         |
|------|-------------|---------|---------|
| DRB1 | 08:10       | 0.00031 | 0       |
| DRB1 | 09:01:02    | 0.00934 | 0.00845 |
| DRB1 | 10:01:01    | 0.00841 | 0.00845 |
| DRB1 | 11:01:01    | 0.05729 | 0.05448 |
| DRB1 | 11:01:02    | 0.00062 | 0.00063 |
| DRB1 | 11:01:13    | 0       | 0.00031 |
| DRB1 | 11:02:01    | 0.00218 | 0.00313 |
| DRB1 | 11:03:01    | 0.00654 | 0.00532 |
| DRB1 | 11:04:01    | 0.03954 | 0.0335  |
| DRB1 | 11:12:01    | 0       | 0.00031 |
| DRB1 | 11:13:02    | 0.00031 | 0       |
| DRB1 | 11:14:01    | 0       | 0.00031 |
| DRB1 | 11:36       | 0.00031 | 0       |
| DRB1 | 11:43       | 0.00031 | 0       |
| DRB1 | 12:01:01    | 0.01712 | 0.02098 |
| DRB1 | 13:01:01    | 0.05635 | 0.05636 |
| DRB1 | 13:02:01    | 0.04981 | 0.04634 |
| DRB1 | 13:03:01    | 0.01027 | 0.01002 |
| DRB1 | 13:05:01    | 0.0028  | 0.0047  |
| DRB1 | 13:10       | 0.00031 | 0.00031 |
| DRB1 | 13:14:01    | 0       | 0.00031 |
| DRB1 | 14:01:01    | 0.0028  | 0.00219 |
| DRB1 | 14:03:01    | 0.00031 | 0       |
| DRB1 | 14:04:01    | 0.00187 | 0.00063 |
| DRB1 | 14:07:01    | 0.00031 | 0       |
| DRB1 | 14:54:01    | 0.02055 | 0.0216  |
| DRB1 | 15:01:01    | 0.13294 | 0.12586 |
| DRB1 | 15:01:08    | 0       | 0.00031 |
| DRB1 | 15:02:01    | 0.0109  | 0.00751 |
| DRB1 | 15:02:02    | 0.00031 | 0       |
| DRB1 | 15:03:01:01 | 0.00031 | 0.00063 |
| DRB1 | 15:14       | 0.00031 | 0       |
| DRB1 | 16:01:01    | 0.01868 | 0.01096 |
| DRB1 | 16:02:01    | 0.00187 | 0.00219 |

**Supplementary Table 2. Results of the DRB1 amino acid association analysis.**

| <b>Locus</b> | <b>Position</b>    | <b>Residue</b> | <b>OR</b>   | <b>CI.lower</b> | <b>CI.upper</b> | <b>p.value</b>    |
|--------------|--------------------|----------------|-------------|-----------------|-----------------|-------------------|
| DRB1         | Position.9         | W              | 1.03        | 0.89            | 1.19            | 0.65707           |
| DRB1         | Position.9         | E              | 0.97        | 0.84            | 1.13            | 0.71337           |
| DRB1         | Position.9         | K              | 0.86        | 0.38            | 1.99            | 0.68662           |
| DRB1         | Position.10        | Q              | 0.86        | 0.75            | 1               | 0.044068          |
| DRB1         | Position.10        | Y              | 1.17        | 1.02            | 1.36            | 0.02711           |
| DRB1         | Position.10        | E              | 0.69        | 0.31            | 1.54            | 0.31194           |
| DRB1         | Position.11        | L              | 1.26        | 1.01            | 1.57            | 0.036154          |
| DRB1         | Position.11        | S              | 1.17        | 1.02            | 1.36            | 0.02711           |
| <b>DRB1</b>  | <b>Position.11</b> | <b>V</b>       | <b>0.73</b> | <b>0.6</b>      | <b>0.88</b>     | <b>0.00064185</b> |
| DRB1         | Position.11        | G              | 1.1         | 0.88            | 1.37            | 0.38772           |
| DRB1         | Position.11        | D              | 0.86        | 0.38            | 1.99            | 0.68662           |
| DRB1         | Position.11        | P              | 0.81        | 0.67            | 0.99            | 0.035353          |
| DRB1         | Position.12        | K              | 0.85        | 0.74            | 0.98            | 0.02711           |
| DRB1         | Position.12        | T              | 1.17        | 1.02            | 1.36            | 0.02711           |
| DRB1         | Position.13        | F              | 1.18        | 0.96            | 1.46            | 0.1076            |
| DRB1         | Position.13        | S              | 1.16        | 1               | 1.34            | 0.04604           |
| <b>DRB1</b>  | <b>Position.13</b> | <b>H</b>       | <b>0.73</b> | <b>0.6</b>      | <b>0.89</b>     | <b>0.0012386</b>  |
| DRB1         | Position.13        | Y              | 1.1         | 0.88            | 1.37            | 0.38772           |
| DRB1         | Position.13        | G              | 1.11        | 0.78            | 1.58            | 0.55033           |
| DRB1         | Position.13        | R              | 0.81        | 0.67            | 0.99            | 0.035353          |
| DRB1         | Position.14        | E              | 0.91        | 0.73            | 1.13            | 0.38772           |
| DRB1         | Position.14        | K              | 1.1         | 0.88            | 1.37            | 0.38772           |
| DRB1         | Position.16        | H              | 0.9         | 0.63            | 1.28            | 0.55033           |
| DRB1         | Position.16        | Y              | 1.11        | 0.78            | 1.58            | 0.55033           |
| DRB1         | Position.25        | R              | 0.91        | 0.73            | 1.13            | 0.38772           |
| DRB1         | Position.25        | Q              | 1.1         | 0.88            | 1.37            | 0.38772           |
| DRB1         | Position.26        | L              | 1.22        | 1               | 1.49            | 0.050809          |
| DRB1         | Position.26        | Y              | 1.17        | 0.95            | 1.45            | 0.12278           |
| <b>DRB1</b>  | <b>Position.26</b> | <b>F</b>       | <b>0.81</b> | <b>0.69</b>     | <b>0.94</b>     | <b>0.006488</b>   |
| DRB1         | Position.28        | E              | 1.19        | 1.02            | 1.4             | 0.028617          |

|             |                    |          |             |             |             |                  |
|-------------|--------------------|----------|-------------|-------------|-------------|------------------|
| DRB1        | Position.28        | D        | 0.85        | 0.72        | 0.99        | 0.036914         |
| DRB1        | Position.28        | H        | 0.86        | 0.38        | 1.99        | 0.68662          |
| DRB1        | Position.30        | C        | 1.26        | 1.01        | 1.57        | 0.036154         |
| DRB1        | Position.30        | Y        | 0.85        | 0.72        | 0.99        | 0.035274         |
| DRB1        | Position.30        | L        | 1.1         | 0.88        | 1.37        | 0.38772          |
| DRB1        | Position.30        | G        | 0.86        | 0.38        | 1.99        | 0.68662          |
| DRB1        | Position.30        | R        | 0.69        | 0.31        | 1.54        | 0.31194          |
| DRB1        | Position.30        | H        | 1.23        | 0.7         | 2.21        | 0.44534          |
| DRB1        | Position.31        | I        | 1.23        | 0.99        | 1.52        | 0.053699         |
| DRB1        | Position.31        | F        | 0.85        | 0.69        | 1.04        | 0.1076           |
| DRB1        | Position.31        | V        | 0.69        | 0.31        | 1.54        | 0.31194          |
| DRB1        | Position.32        | Y        | 0.83        | 0.71        | 0.97        | 0.01906          |
| DRB1        | Position.32        | H        | 1.2         | 1.03        | 1.41        | 0.01906          |
| DRB1        | Position.33        | N        | 1.36        | 1.12        | 1.65        | 0.0012386        |
| <b>DRB1</b> | <b>Position.33</b> | <b>H</b> | <b>0.73</b> | <b>0.6</b>  | <b>0.89</b> | <b>0.0012386</b> |
| DRB1        | Position.37        | S        | 0.99        | 0.85        | 1.16        | 0.90793          |
| DRB1        | Position.37        | N        | 1.18        | 1           | 1.4         | 0.043824         |
| <b>DRB1</b> | <b>Position.37</b> | <b>Y</b> | <b>0.8</b>  | <b>0.68</b> | <b>0.93</b> | <b>0.003297</b>  |
| DRB1        | Position.37        | F        | 1.13        | 0.92        | 1.39        | 0.22206          |
| DRB1        | Position.37        | L        | 1.23        | 0.7         | 2.21        | 0.44534          |
| DRB1        | Position.38        | V        | 0.99        | 0.62        | 1.55        | 0.95872          |
| DRB1        | Position.38        | A        | 0.69        | 0.31        | 1.54        | 0.31194          |
| DRB1        | Position.38        | L        | 1.23        | 0.7         | 2.21        | 0.44534          |
| DRB1        | Position.40        | F        | 1.46        | 0.65        | 3.25        | 0.31194          |
| DRB1        | Position.40        | Y        | 0.69        | 0.31        | 1.54        | 0.31194          |
| DRB1        | Position.47        | Y        | 0.93        | 0.81        | 1.07        | 0.30036          |
| DRB1        | Position.47        | F        | 1.08        | 0.93        | 1.24        | 0.30036          |
| DRB1        | Position.57        | D        | 0.91        | 0.76        | 1.08        | 0.26286          |
| DRB1        | Position.57        | S        | 0.97        | 0.68        | 1.39        | 0.85911          |
| DRB1        | Position.57        | V        | 1.1         | 0.9         | 1.35        | 0.32766          |
| DRB1        | Position.57        | A        | 1.27        | 0.77        | 2.13        | 0.32725          |
| DRB1        | Position.58        | A        | 1.03        | 0.8         | 1.3         | 0.83338          |
| DRB1        | Position.58        | E        | 0.98        | 0.77        | 1.24        | 0.83338          |

|      |             |   |      |      |      |          |
|------|-------------|---|------|------|------|----------|
| DRB1 | Position.60 | Y | 0.88 | 0.73 | 1.07 | 0.18883  |
| DRB1 | Position.60 | S | 1.1  | 0.9  | 1.35 | 0.32766  |
| DRB1 | Position.60 | H | 1.27 | 0.77 | 2.13 | 0.32725  |
| DRB1 | Position.67 | L | 1.04 | 0.9  | 1.2  | 0.61839  |
| DRB1 | Position.67 | I | 0.99 | 0.85 | 1.14 | 0.84823  |
| DRB1 | Position.67 | F | 0.96 | 0.78 | 1.17 | 0.66663  |
| DRB1 | Position.70 | Q | 0.97 | 0.84 | 1.12 | 0.64672  |
| DRB1 | Position.70 | D | 1.03 | 0.89 | 1.19 | 0.66814  |
| DRB1 | Position.70 | R | 1.02 | 0.7  | 1.48 | 0.93332  |
| DRB1 | Position.71 | R | 1.12 | 0.97 | 1.29 | 0.11587  |
| DRB1 | Position.71 | E | 1    | 0.81 | 1.23 | 0.99203  |
| DRB1 | Position.71 | K | 0.94 | 0.79 | 1.11 | 0.42852  |
| DRB1 | Position.71 | A | 0.87 | 0.71 | 1.08 | 0.19064  |
| DRB1 | Position.73 | A | 0.85 | 0.72 | 1    | 0.045738 |
| DRB1 | Position.73 | G | 1.18 | 1    | 1.39 | 0.045738 |
| DRB1 | Position.74 | A | 0.84 | 0.73 | 0.98 | 0.026734 |
| DRB1 | Position.74 | R | 1.2  | 0.97 | 1.49 | 0.083138 |
| DRB1 | Position.74 | E | 1.12 | 0.8  | 1.58 | 0.48977  |
| DRB1 | Position.74 | Q | 1.1  | 0.88 | 1.37 | 0.38772  |
| DRB1 | Position.74 | L | 1.03 | 0.66 | 1.63 | 0.89123  |
| DRB1 | Position.77 | T | 0.83 | 0.67 | 1.03 | 0.083138 |
| DRB1 | Position.77 | N | 1.2  | 0.97 | 1.49 | 0.083138 |
| DRB1 | Position.78 | Y | 0.93 | 0.75 | 1.14 | 0.46538  |
| DRB1 | Position.78 | V | 1.08 | 0.87 | 1.34 | 0.46538  |
| DRB1 | Position.85 | V | 0.92 | 0.61 | 1.37 | 0.66026  |
| DRB1 | Position.85 | A | 1.09 | 0.73 | 1.65 | 0.66026  |
| DRB1 | Position.86 | G | 0.88 | 0.77 | 1.02 | 0.081663 |
| DRB1 | Position.86 | V | 1.13 | 0.98 | 1.31 | 0.081663 |

OR: Odds Ratio; CI:

**Supplementary Table 3. Frequency of shared epitope alleles in individuals with and without available data for smoking history, in Parkinson's disease cases and controls.**

| Cases   | Smoking data+ | Smoking data- |
|---------|---------------|---------------|
| SE-     | 0.74          | 0.78          |
| SE+V11- | 0.13          | 0.11          |
| SE+V11+ | 0.13          | 0.11          |
| Control |               |               |
| SE-     | 0.76          | 0.76          |
| SE+V11- | 0.10          | 0.09          |
| SE_V11+ | 0.13          | 0.15          |

**Supplementary Table 4. Interaction of HLA and smoking history in Parkinson's disease cases and controls.**

| HLA Shared Epitope (Copy Number) | Smoking History | Case (N=837) | Control (N=918) | p value | Odds Ratio (95% Confidence Interval) |
|----------------------------------|-----------------|--------------|-----------------|---------|--------------------------------------|
| <u>+IIV</u><br>1/2               | negative        | 116          | 143             | NS      |                                      |
|                                  | positive        | 59           | 118             | 0.0001  | 0.51 (0.36-0.72)                     |
|                                  | negative        | 384          | 377             | 0.04    | 1.2 (1.01-1.47)                      |
|                                  | positive        | 278          | 280             | NS      |                                      |
| <u>-IIV</u><br>1/2               | negative        | 115          | 88              | 0.01    | 1.51 (1.08-2.12)                     |
|                                  | positive        | 60           | 65              | NS      |                                      |
|                                  | negative        | 385          | 429             | NS      |                                      |
|                                  | positive        | 277          | 333             | NS      |                                      |

**Supplementary Table 5. Predicted binding affinity (nM) for alpha-synuclein derived peptides.**

| Peptide             | DRB1_0101 | DRB1_0102 | DRB1_0103 | DRB1_0401 | DRB1_0402 | DRB1_0404 | DRB1_0405 |
|---------------------|-----------|-----------|-----------|-----------|-----------|-----------|-----------|
| MDVFMKGLSK<br>AKEGV | 62        | 189       | 1314      | 844       | 460       | 353       | 1064      |
| DVFMKGLSKA<br>KEGVV | 90        | 248       | 1759      | 1143      | 602       | 489       | 1415      |
| VFMKGLSKAK<br>EGVVA | 122       | 277       | 1963      | 1388      | 697       | 586       | 1650      |
| FMKGLSKAKE<br>GVVAA | 201       | 492       | 3255      | 2294      | 1185      | 959       | 2598      |



|                      |      |      |       |       |       |       |       |
|----------------------|------|------|-------|-------|-------|-------|-------|
| MKGLSKAKEG<br>VVAAA  | 271  | 1305 | 4463  | 3387  | 2553  | 1967  | 4551  |
| KGLSKAKEGV<br>VAAAE  | 361  | 2116 | 5588  | 3762  | 4018  | 2941  | 5656  |
| GLSKAKEGVV<br>AAAEK  | 564  | 2804 | 7400  | 3989  | 4993  | 3283  | 6082  |
| LSKAKEGVVA<br>AAEKT  | 841  | 3432 | 9255  | 4188  | 6578  | 3888  | 6419  |
| SKAKEGVVAA<br>AEKTK  | 1021 | 4077 | 11420 | 4524  | 7756  | 4601  | 6872  |
| KAKEGVVAAA<br>EKTKQ  | 855  | 3625 | 10958 | 4228  | 6330  | 4058  | 6527  |
| AKEGVVAAAE<br>KTKQG  | 948  | 3728 | 11861 | 4480  | 6254  | 4192  | 7213  |
| KEGVVAAAEK<br>TKQGV  | 929  | 3143 | 11582 | 3922  | 5275  | 3419  | 6761  |
| EGVVAAAEKT<br>KQGVA  | 1344 | 3645 | 12858 | 4308  | 5336  | 3332  | 7361  |
| GVVAAAEKTK<br>QGVAE  | 1759 | 4141 | 14073 | 4793  | 5586  | 3542  | 7858  |
| VVAAAEKTKQ<br>GVAEA  | 2884 | 5856 | 16813 | 6261  | 7262  | 4775  | 9359  |
| VAAAEKTKQG<br>VAEAA  | 3527 | 8239 | 17759 | 8545  | 10955 | 7682  | 11786 |
| AAAEKTKQGV<br>AEAAG  | 3577 | 9237 | 18534 | 10700 | 14090 | 10653 | 14197 |
| AAEKTKQGVA<br>EAAGK  | 2909 | 8098 | 17110 | 9603  | 13553 | 9951  | 13759 |
| AEKTKQGVAE<br>AAGKT  | 2473 | 7441 | 15681 | 8940  | 13374 | 9955  | 13541 |
| EKTKQGVAEA<br>AGKTK  | 2119 | 6331 | 14566 | 8581  | 12530 | 9529  | 13789 |
| KTKQGVAEAA<br>GKTKE  | 2230 | 6285 | 14864 | 9139  | 12544 | 9983  | 14574 |
| TKQGVAEAAAG<br>KTKEG | 3064 | 7485 | 16890 | 11289 | 13978 | 12174 | 17063 |
| KQGVAEAAAGK<br>TKEGV | 3187 | 7616 | 17046 | 11735 | 13498 | 12031 | 17072 |
| QGVAEAAAGKT<br>KEGVL | 4445 | 8836 | 18815 | 13992 | 14358 | 13321 | 17647 |
| GVAEAAGKTK<br>EGVLY  | 4966 | 8698 | 17852 | 14719 | 13836 | 13326 | 16941 |
| VAEAAGKTKE<br>GVLYV  | 3403 | 7254 | 15144 | 9943  | 11742 | 9886  | 11475 |
| AEAAGKTKEG<br>VLYVG  | 2707 | 6592 | 15091 | 8599  | 11911 | 8429  | 10017 |

|                      |      |      |       |      |       |      |       |
|----------------------|------|------|-------|------|-------|------|-------|
| EAAGKTKEGV<br>LYVGS  | 2163 | 5652 | 14046 | 7330 | 10816 | 6881 | 8386  |
| AAGKTKEGVL<br>YVGSK  | 1758 | 4636 | 12965 | 6304 | 8893  | 5498 | 6933  |
| AGKTKEGVLY<br>VGSKT  | 1136 | 3476 | 9781  | 4981 | 6064  | 3933 | 4913  |
| GKTKEGVLYV<br>GSKTK  | 623  | 1905 | 6117  | 3107 | 2611  | 1956 | 3102  |
| KTKEGVLYVG<br>SKTKE  | 526  | 1555 | 5552  | 2542 | 2095  | 1546 | 2649  |
| TKEGVLYVGS<br>KTKEG  | 476  | 1447 | 5560  | 1937 | 1983  | 1457 | 2532  |
| KEGVLYVGSK<br>TKEGV  | 335  | 1220 | 4493  | 1062 | 1617  | 1147 | 1848  |
| EGVLYVGSKT<br>KEGVV  | 301  | 1426 | 5069  | 785  | 1812  | 1229 | 1641  |
| GVLVYVGSKTK<br>EGVVH | 307  | 1567 | 5445  | 765  | 2006  | 1361 | 1734  |
| VLYVGSKTKE<br>GVVHG  | 436  | 2592 | 7962  | 1044 | 3261  | 2115 | 2343  |
| LYVGSKTKEG<br>VVHGV  | 898  | 4272 | 11161 | 1933 | 6440  | 3812 | 4263  |
| YVGSKTKEGV<br>VHGVA  | 2181 | 5483 | 13569 | 6109 | 9064  | 6338 | 9770  |
| VGSKTKEGVV<br>HGVAT  | 2662 | 5960 | 14223 | 8819 | 10261 | 7314 | 11561 |
| GSKTKEGVVH<br>GVATV  | 1424 | 4978 | 10680 | 6979 | 8535  | 5775 | 9362  |
| SKTKEGVVHG<br>VATVA  | 282  | 2613 | 5968  | 3174 | 4470  | 2250 | 5017  |
| KTKEGVVHGV<br>ATVAE  | 154  | 1911 | 4775  | 1934 | 3247  | 1227 | 3101  |
| TKEGVVHGVA<br>TVAEK  | 98   | 1417 | 3653  | 1333 | 2233  | 735  | 2114  |
| KEGVVHGVAT<br>VAEKT  | 87   | 1290 | 3401  | 1192 | 2012  | 632  | 1850  |
| EGVVHGVATV<br>AEKTK  | 133  | 1644 | 4617  | 1497 | 2627  | 828  | 2153  |
| GVVHGVATVA<br>EKTKE  | 179  | 1940 | 5548  | 1855 | 3038  | 991  | 2504  |
| VVHGVATVAE<br>KTKEQ  | 546  | 3310 | 9900  | 3139 | 5228  | 1850 | 3735  |
| VHGVATVAEK<br>TKEQV  | 2138 | 5832 | 15272 | 5612 | 8584  | 4977 | 7131  |
| HGVATVAEKT<br>KEQVT  | 3309 | 7369 | 17348 | 7159 | 9999  | 6727 | 9715  |

|                  |      |       |       |      |       |      |       |
|------------------|------|-------|-------|------|-------|------|-------|
| GVATVAEKTKEQVTN  | 4815 | 8680  | 19555 | 8500 | 11107 | 7558 | 11009 |
| VATVAEKTKEQVTNV  | 5654 | 10177 | 20485 | 8489 | 12204 | 8384 | 10748 |
| ATVAEKTKEQVTNVG  | 6246 | 11719 | 21138 | 8408 | 13320 | 9383 | 11465 |
| TVAEKTKEQVTNVGG  | 6423 | 12433 | 21569 | 8157 | 13149 | 8887 | 11572 |
| VAEKTKEQVTNVGGA  | 5260 | 11767 | 19878 | 6609 | 12163 | 6909 | 10238 |
| AEKTKEQVTNVGGAV  | 2443 | 9175  | 11735 | 5019 | 9542  | 5169 | 8262  |
| EKTKEQVTNVGGAVV  | 587  | 4775  | 5851  | 3581 | 6153  | 3447 | 5996  |
| KTKEQVTNVGGAVVT  | 277  | 3099  | 4288  | 3092 | 4859  | 2653 | 5023  |
| TKEQVTNVGGAVVTG  | 253  | 2923  | 4356  | 3711 | 5269  | 3085 | 5820  |
| KEQVTNVGGAVVVTGV | 202  | 2528  | 3905  | 3833 | 5100  | 2776 | 5872  |
| EQVTNVGGAVVVTGVT | 334  | 3303  | 5464  | 4986 | 6697  | 3702 | 7561  |
| QVTNVGGAVVVTGVTA | 431  | 3534  | 6764  | 5259 | 7688  | 3677 | 7826  |
| VTNVGGAVVVTGVTAV | 638  | 4335  | 9102  | 4646 | 8290  | 3421 | 6454  |
| TNVGGAVVVTGVTAVA | 427  | 3494  | 7984  | 2465 | 4888  | 1672 | 3939  |
| NVGGAVVVTGVTAVAQ | 235  | 2274  | 6701  | 1315 | 2926  | 730  | 2438  |
| VGGAVVVTGVTAVAQK | 151  | 1596  | 5529  | 874  | 1846  | 401  | 1709  |
| GGAVVVTGVTAVAQKT | 140  | 1490  | 5284  | 825  | 1662  | 353  | 1628  |
| GAVVVTGVTAVAQKTV | 149  | 1514  | 5516  | 944  | 1670  | 362  | 1673  |
| AVVVTGVTAVAQKTV  | 216  | 1830  | 6770  | 1364 | 2163  | 504  | 2093  |
| VVTGVTAVAQKTV    | 441  | 2559  | 8947  | 2293 | 3235  | 946  | 3133  |
| VTGVTAVAQKTV     | 757  | 3436  | 11518 | 3043 | 5105  | 1927 | 4699  |
| TGVTAVAQKTV      | 1098 | 4277  | 13591 | 3598 | 6345  | 2503 | 6101  |
| GVTAVAQKTV       | 1346 | 4637  | 14805 | 3575 | 6325  | 2305 | 6144  |

|                     |       |       |       |       |       |       |       |
|---------------------|-------|-------|-------|-------|-------|-------|-------|
| VTAVAQKTVE<br>GAGSI | 1383  | 4906  | 14949 | 3790  | 7030  | 2402  | 6288  |
| TAVAQKTVEG<br>AGSIA | 1209  | 5149  | 13351 | 4533  | 8121  | 3270  | 7470  |
| AVAQKTVEGA<br>GSIAA | 565   | 3812  | 9095  | 3278  | 7056  | 3100  | 6117  |
| VAQKTVEGAG<br>SIAAA | 253   | 2874  | 6576  | 1995  | 5554  | 1995  | 4389  |
| AQKTVEGAGSI<br>AAAT | 194   | 2648  | 6069  | 1633  | 5098  | 1582  | 3875  |
| QKTVEGAGSIA<br>AATG | 204   | 2719  | 6489  | 1789  | 5201  | 1642  | 4355  |
| KTVEGAGSIAA<br>ATGF | 260   | 3138  | 7251  | 2193  | 5943  | 2002  | 5117  |
| TVEGAGSIAAA<br>TGFV | 412   | 3525  | 8068  | 3122  | 7247  | 2955  | 5884  |
| VEGAGSIAAAT<br>GFVK | 152   | 1287  | 3539  | 1734  | 2452  | 1106  | 2597  |
| EGAGSIAAATG<br>FVKK | 76    | 694   | 2149  | 1110  | 1371  | 603   | 1685  |
| GAGSIAAATGF<br>VKKD | 86    | 763   | 2541  | 1143  | 1553  | 636   | 1761  |
| AGSIAAATGFV<br>KKDQ | 83    | 718   | 2585  | 1126  | 1458  | 605   | 1722  |
| GSIAAATGFVK<br>KDQL | 104   | 825   | 3211  | 1359  | 1696  | 743   | 2013  |
| SIAAATGFVKK<br>DQLG | 181   | 1206  | 4597  | 2138  | 2362  | 1174  | 2864  |
| IAAATGFVKKD<br>QLGK | 684   | 2464  | 7477  | 3968  | 3609  | 2795  | 5000  |
| AAATGFVKKD<br>QLGKN | 2170  | 4183  | 11590 | 4942  | 5109  | 4528  | 6104  |
| AATGFVKKDQ<br>LGKNE | 2236  | 4477  | 12398 | 4506  | 5361  | 4430  | 5988  |
| ATGFVKKDQL<br>GKNEE | 2410  | 4887  | 13262 | 4517  | 5994  | 4664  | 6164  |
| TGFVKKDQLG<br>KNEEG | 2745  | 5522  | 14352 | 4870  | 6872  | 5272  | 6731  |
| GFVKKDQLGK<br>NEEGA | 3442  | 6568  | 16140 | 5655  | 8245  | 6446  | 8043  |
| FVKKDQLGKN<br>EEGAP | 6260  | 9768  | 20189 | 8353  | 11962 | 9565  | 11250 |
| VKKDQLGKNE<br>EGAPQ | 11525 | 16709 | 26660 | 14299 | 20767 | 16292 | 17801 |
| KKDQLGKNEE<br>GAPQE | 13684 | 19495 | 28663 | 17350 | 23460 | 19964 | 21294 |

|                     |       |       |       |       |       |       |       |
|---------------------|-------|-------|-------|-------|-------|-------|-------|
| KDQLGKNEEG<br>APQEG | 15545 | 21119 | 29905 | 19296 | 24841 | 22025 | 23405 |
| DQLGKNEEGA<br>PQEGI | 15418 | 21101 | 30035 | 19701 | 25686 | 23709 | 23836 |
| QLGKNEEGAP<br>QEGIL | 12693 | 18902 | 27937 | 18162 | 24826 | 22434 | 22134 |
| LGKNEEGAPQ<br>EGILE | 12391 | 18499 | 27863 | 18307 | 25988 | 22896 | 21283 |
| GKNEEGAPQE<br>GILED | 13408 | 19863 | 29259 | 19697 | 27309 | 24381 | 21570 |
| KNEEGAPQEGI<br>LEDM | 11615 | 17935 | 27597 | 17514 | 25339 | 21259 | 17858 |
| NEEGAPQEGIL<br>EDMP | 12780 | 18796 | 28586 | 18158 | 25806 | 21113 | 17930 |
| EEGAPQEGILE<br>DMPV | 8608  | 14819 | 25606 | 12705 | 21142 | 13695 | 11439 |
| EGAPQEGILED<br>MPVD | 7681  | 13570 | 24221 | 10575 | 19725 | 11594 | 9717  |
| GAPQEGILEDM<br>PVDP | 6395  | 11466 | 21206 | 6711  | 14892 | 8606  | 7271  |
| APQEGILEDMP<br>VDPD | 6212  | 10849 | 20732 | 5543  | 12817 | 7128  | 6029  |
| PQEGILEDMPV<br>DPDN | 5901  | 10385 | 20426 | 4813  | 11757 | 6064  | 5288  |
| QEGILEDMPVD<br>PDNE | 5986  | 10570 | 20669 | 4752  | 11657 | 5965  | 5243  |
| EGILEDMPVDP<br>DNEA | 6790  | 11396 | 21467 | 5001  | 12048 | 6305  | 5448  |
| GILEDMPVDPD<br>NEAY | 7797  | 12806 | 22416 | 5319  | 12440 | 6717  | 6053  |
| ILEDMPVDPDN<br>EAYE | 10766 | 15303 | 24848 | 7819  | 15563 | 9455  | 8371  |
| LEDMPVDPDN<br>EAYEM | 14159 | 18818 | 26586 | 9247  | 18839 | 12837 | 11373 |
| EDMPVDPDNE<br>AYEMP | 16494 | 21753 | 27899 | 11411 | 21697 | 16458 | 14367 |
| DMPVDPDNEA<br>YEMPS | 16539 | 22237 | 28104 | 11855 | 22335 | 17286 | 15071 |
| MPVDPDNEAY<br>EMPSE | 16874 | 22244 | 28503 | 12534 | 22803 | 18527 | 15306 |
| PVDPDNEAYE<br>MPSEE | 18523 | 23185 | 29769 | 15998 | 25707 | 22584 | 16226 |
| VDPDNEAYEM<br>PSEEG | 14176 | 21490 | 29900 | 13562 | 25286 | 19379 | 14140 |
| DPDNEAYEMP<br>SEEGY | 8208  | 18303 | 27075 | 8827  | 22458 | 15424 | 10071 |

|                     |       |       |       |       |       |       |       |
|---------------------|-------|-------|-------|-------|-------|-------|-------|
| PDNEAYEMPSE<br>EGYQ | 6711  | 16702 | 25668 | 7312  | 20825 | 13523 | 8592  |
| DNEAYEMPSE<br>EGYQD | 7727  | 17638 | 26240 | 7700  | 21319 | 14275 | 9050  |
| NEAYEMPSEE<br>GYQDY | 6571  | 16680 | 25240 | 6875  | 20406 | 12904 | 7984  |
| EAYEMPSEEG<br>YQDYE | 7697  | 18381 | 26820 | 8195  | 22188 | 14462 | 9382  |
| AYEMPSEEGY<br>QDYEP | 9909  | 20663 | 28550 | 10751 | 24681 | 16940 | 11619 |
| YEMPSEEGYQ<br>DYEPE | 15992 | 24332 | 31415 | 16224 | 27562 | 21692 | 16014 |
| EMPSEEGYQD<br>YEPEA | 20360 | 25836 | 32680 | 19012 | 27762 | 23729 | 18181 |

**Supplementary Table 6. Predicted binding affinity (nM) for modified alpha-synuclein derived peptides.**

| Peptide             | DRB1_<br>0101 | DRB1_<br>0102 | DRB1_<br>0103 | DRB1_<br>0401 | DRB1_<br>0402 | DRB1_<br>0404 | DRB1_<br>0405 |
|---------------------|---------------|---------------|---------------|---------------|---------------|---------------|---------------|
| MDVFMXGLSX<br>AXEGV | 41            | 604           | 2853          | 505           | 1526          | 426           | 564           |
| DVFMXGLSXA<br>XEGVV | 57            | 890           | 3775          | 684           | 2326          | 634           | 780           |
| VFMXGLSXAX<br>EGVVA | 76            | 1103          | 4532          | 913           | 3027          | 880           | 1031          |
| FMXGLSXAXE<br>GVVAA | 206           | 2071          | 7502          | 1982          | 5481          | 1862          | 2114          |
| MXGLSXAXEG<br>VVAAA | 553           | 4194          | 9861          | 3309          | 8455          | 3649          | 4527          |
| XGLSXAXEGV<br>VAAAE | 665           | 4826          | 11014         | 3438          | 9709          | 4444          | 5595          |
| GLSXAXEGVV<br>AAAEX | 755           | 5139          | 11730         | 3477          | 10187         | 4662          | 5650          |
| LSXAXEGVVA<br>AAEXT | 1000          | 5787          | 13420         | 3802          | 11705         | 5321          | 6077          |
| SXAXEGVVAA<br>AEXTX | 1862          | 7134          | 16596         | 5181          | 14015         | 6942          | 7763          |
| XAXEGVVAAA<br>EXTXQ | 1958          | 6907          | 17343         | 4911          | 12305         | 5423          | 6941          |
| AXEGVVAAA<br>XTXQG  | 1935          | 6705          | 18160         | 4309          | 11874         | 4451          | 6514          |
| XEGVVAAA<br>TXQGV   | 1447          | 5723          | 17493         | 3035          | 10290         | 3101          | 5130          |

|                     |      |       |       |       |       |       |       |
|---------------------|------|-------|-------|-------|-------|-------|-------|
| EGVAAAEXT<br>XQGVA  | 1444 | 5693  | 17441 | 2619  | 9701  | 2766  | 4666  |
| GVVAAAEXTX<br>QGVAE | 1743 | 6510  | 18409 | 2873  | 10261 | 3027  | 5066  |
| VVAAAEXTXQ<br>GVAEA | 2893 | 8994  | 20314 | 4039  | 12610 | 4509  | 6422  |
| VAAAEXTXQG<br>VAEAA | 3733 | 10597 | 21120 | 6523  | 15667 | 8080  | 9513  |
| AAAEXTXQGV<br>AEAAG | 4090 | 11202 | 21892 | 9437  | 17613 | 10953 | 12268 |
| AAEXTXQGVA<br>EAAGX | 4121 | 10729 | 21900 | 10158 | 18349 | 11662 | 13258 |
| AEXTXQGVAE<br>AAGXT | 4087 | 10609 | 21429 | 10682 | 18735 | 12668 | 14523 |
| EXTXQGVAEA<br>AGXTX | 3993 | 10395 | 20770 | 10906 | 18974 | 13317 | 16166 |
| XTXQGVAEAA<br>GXTXE | 3782 | 10498 | 21140 | 10932 | 19248 | 13103 | 16365 |
| TXQGVAEAA<br>XTXEG  | 4111 | 11344 | 22349 | 12020 | 20271 | 13954 | 17713 |
| XQGVAEAA<br>TXEGV   | 3523 | 10976 | 22004 | 10935 | 19676 | 12720 | 15807 |
| QGVAEAA<br>XEGVL    | 3639 | 11243 | 21940 | 10471 | 19269 | 12283 | 14334 |
| GVAEAA<br>EGVLY     | 4079 | 11469 | 21749 | 10585 | 18672 | 12596 | 13016 |
| VAEAA<br>GVLYV      | 3098 | 9682  | 18658 | 7451  | 16044 | 9835  | 8747  |
| AEAAG<br>VLYVG      | 2559 | 8761  | 18562 | 6778  | 15342 | 8789  | 8052  |
| EAAG<br>LYVGS       | 2073 | 7684  | 17679 | 6122  | 14100 | 7385  | 7009  |
| AAG<br>YVGSX        | 1917 | 7261  | 17720 | 6032  | 13712 | 6782  | 6757  |
| AG<br>VGSXT         | 1546 | 6301  | 15130 | 5418  | 10683 | 5245  | 5590  |
| G<br>GSXTX          | 569  | 3822  | 11263 | 2381  | 5586  | 1695  | 2355  |
| X<br>SXTXE          | 332  | 2876  | 10006 | 1432  | 3960  | 934   | 1453  |
| TX<br>XTXEG         | 278  | 2550  | 9441  | 869   | 3490  | 779   | 1161  |
| XEG<br>TXEGV        | 179  | 2072  | 7663  | 444   | 2667  | 580   | 704   |
| EG<br>XEGVV         | 158  | 1983  | 7249  | 311   | 2588  | 559   | 551   |

|                     |      |       |       |      |       |      |      |
|---------------------|------|-------|-------|------|-------|------|------|
| GVLVGSXTX<br>EGVVH  | 172  | 2176  | 7688  | 300  | 2847  | 660  | 587  |
| VLYVGSXTXE<br>GVVHG | 293  | 3471  | 10452 | 392  | 4732  | 1220 | 821  |
| LYVGSXTXEG<br>VVHGV | 740  | 5881  | 14272 | 793  | 9023  | 2916 | 1782 |
| YVGSXTXEGV<br>VHGVA | 1622 | 6971  | 16433 | 2974 | 11522 | 5225 | 5444 |
| VGSXTXEGVV<br>HGVAT | 2221 | 7227  | 17665 | 6310 | 12997 | 6776 | 9353 |
| GSXTXEGVVH<br>GVATV | 1810 | 6213  | 13723 | 6356 | 11034 | 6334 | 9366 |
| SXTXEGVVHG<br>VATVA | 428  | 3487  | 7700  | 3786 | 5902  | 2948 | 5976 |
| XTXEGVVHGV<br>ATVAE | 236  | 2553  | 6168  | 2638 | 4317  | 1747 | 3927 |
| TXEGVVHGVA<br>TVAEX | 189  | 2249  | 5635  | 2172 | 3700  | 1321 | 3076 |
| XEGVVHGVAT<br>VAEXT | 166  | 2112  | 5345  | 1936 | 3419  | 1122 | 2699 |
| EGVVHGVATV<br>AEXTX | 185  | 2256  | 5745  | 2023 | 3627  | 1187 | 2783 |
| GVVHGVATVA<br>EXTXE | 258  | 2690  | 6977  | 2516 | 4340  | 1443 | 3255 |
| VVHGVATVAE<br>XTXEQ | 890  | 4813  | 12920 | 4079 | 7967  | 2785 | 4732 |
| VHGVATVAEX<br>TXEQV | 3926 | 9103  | 20048 | 5878 | 13751 | 6084 | 6697 |
| HGVATVAEXT<br>XEQVT | 4587 | 10524 | 21539 | 5912 | 14999 | 6455 | 6664 |
| GVATVAEXTX<br>EQVTN | 5197 | 11782 | 23188 | 5990 | 15638 | 6686 | 6702 |
| VATVAEXTXE<br>QVTNV | 4663 | 12866 | 22594 | 5800 | 15631 | 6853 | 6321 |
| ATVAEXTXEQ<br>VTNVG | 5288 | 13979 | 23231 | 6532 | 16896 | 8393 | 7630 |
| TVAEXTXEQV<br>TNVGG | 5822 | 14636 | 23220 | 6767 | 16921 | 9271 | 8752 |
| VAEXTXEQVT<br>NVGGA | 5310 | 13863 | 21857 | 5838 | 15821 | 8326 | 9381 |
| AEXTXEQVTN<br>VGGAV | 2856 | 11151 | 13496 | 4791 | 12029 | 6443 | 8123 |
| EXTXEQVTNV<br>GGAVV | 839  | 6133  | 7257  | 3632 | 7936  | 4301 | 6125 |
| XTXEQVTNVG<br>GAVVT | 421  | 4075  | 5520  | 3398 | 6314  | 3394 | 5492 |



|                     |      |      |       |      |      |      |      |
|---------------------|------|------|-------|------|------|------|------|
| TXEQVTNVGG<br>AVVTG | 378  | 3677 | 5506  | 3913 | 6370 | 3629 | 6181 |
| XEQVTNVGGA<br>VVTGV | 302  | 3185 | 4965  | 4515 | 6225 | 3580 | 6889 |
| EQVTNVGGAV<br>VTGVT | 334  | 3303 | 5464  | 4986 | 6697 | 3702 | 7561 |
| QVTNVGGAVV<br>TGVT  | 431  | 3534 | 6764  | 5259 | 7688 | 3677 | 7826 |
| VTNVGGAVVT<br>GVTAV | 638  | 4335 | 9102  | 4646 | 8290 | 3421 | 6454 |
| TNVGGAVVTG<br>VTAVA | 427  | 3494 | 7984  | 2465 | 4888 | 1672 | 3939 |
| NVGGAVVTGV<br>TAVAQ | 235  | 2274 | 6701  | 1315 | 2926 | 730  | 2438 |
| VGGAVVTGVT<br>AVAQX | 200  | 1978 | 6481  | 1106 | 2379 | 533  | 2019 |
| GGAVVTGVT<br>VAQXT  | 188  | 1897 | 6371  | 1052 | 2200 | 476  | 1946 |
| GAVVTGVTAV<br>AQXTV | 209  | 2035 | 6857  | 1202 | 2263 | 500  | 1975 |
| AVVTGVTAVA<br>QXTVE | 313  | 2480 | 8453  | 1671 | 2875 | 696  | 2436 |
| VVTGVTAVAQ<br>XTVEG | 627  | 3404 | 11017 | 2579 | 4321 | 1276 | 3387 |
| VTGVTAVAQX<br>TVEGA | 1001 | 4458 | 13831 | 2857 | 6569 | 2147 | 3949 |
| TGVTAVAQXT<br>VEGAG | 1313 | 5240 | 15888 | 2894 | 7729 | 2209 | 4186 |
| GVTAVAQXTV<br>EGAGS | 1462 | 5461 | 16907 | 2664 | 7542 | 1899 | 3893 |
| VTAVAQXTVE<br>GAGSI | 1366 | 5379 | 16201 | 2661 | 7870 | 1859 | 3803 |
| TAVAQXTVEG<br>AGSIA | 1269 | 5639 | 13969 | 3218 | 9214 | 2529 | 4796 |
| AVAQXTVEGA<br>GSIAA | 717  | 4539 | 10024 | 3140 | 8450 | 2919 | 5327 |
| VAQXTVEGAG<br>SIAAA | 342  | 3590 | 7553  | 2539 | 6984 | 2592 | 5216 |
| AQXTVEGAGSI<br>AAAT | 275  | 3331 | 7162  | 2216 | 6482 | 2271 | 5010 |
| QXTVEGAGSIA<br>AATG | 300  | 3460 | 7566  | 2441 | 6577 | 2342 | 5618 |
| XTVEGAGSIAA<br>ATGF | 379  | 3829 | 8344  | 2949 | 7285 | 2784 | 6411 |
| TVEGAGSIAAA<br>TGFV | 412  | 3525 | 8068  | 3122 | 7247 | 2955 | 5884 |

|                     |       |       |       |       |       |       |       |
|---------------------|-------|-------|-------|-------|-------|-------|-------|
| VEGAGSIAAAT<br>GFVX | 140   | 1609  | 4683  | 1752  | 3439  | 1131  | 2410  |
| EGAGSIAAATG<br>FVXX | 76    | 1054  | 3563  | 1209  | 2322  | 675   | 1595  |
| GAGSIAAATGF<br>VXXD | 84    | 1140  | 4152  | 1217  | 2565  | 688   | 1625  |
| AGSIAAATGFV<br>XXDQ | 78    | 1068  | 4156  | 1150  | 2392  | 625   | 1503  |
| GSIAAATGFVX<br>XDQL | 98    | 1266  | 5065  | 1382  | 2777  | 761   | 1690  |
| SIAAATGFVXX<br>DQLG | 168   | 1844  | 7059  | 1961  | 3830  | 1188  | 2119  |
| IAAATGFVXX<br>DQLGX | 528   | 3609  | 10894 | 2395  | 6142  | 2391  | 2241  |
| AAATGFVXXD<br>QLGXN | 942   | 5195  | 13515 | 1870  | 7641  | 2641  | 1889  |
| AATGFVXXDQ<br>LGXNE | 898   | 5224  | 13804 | 1709  | 7573  | 2495  | 1814  |
| ATGFVXXDQL<br>GXNEE | 938   | 5554  | 14363 | 1729  | 7958  | 2588  | 1881  |
| TGFVXXDQLG<br>XNEEG | 1114  | 6149  | 15265 | 1991  | 8820  | 3012  | 2219  |
| GFVXXDQLGX<br>NEEGA | 1590  | 7396  | 17318 | 2686  | 10462 | 4094  | 3082  |
| FVXXDQLGXN<br>EEGAP | 4166  | 12094 | 22361 | 5836  | 16001 | 8588  | 6772  |
| VXXDQLGXNE<br>EGAPQ | 13462 | 20906 | 29583 | 16313 | 25180 | 19845 | 18660 |
| XXDQLGXNEE<br>GAPQE | 15674 | 22840 | 31079 | 19655 | 27198 | 23564 | 22154 |
| XDQLGXNEEG<br>APQEG | 17159 | 23221 | 31528 | 20443 | 27751 | 24682 | 23549 |
| DQLGXNEEGA<br>PQEGI | 16119 | 21957 | 30888 | 20197 | 27348 | 25343 | 23630 |
| QLGXNEEGAP<br>QEGIL | 13719 | 20044 | 29014 | 18868 | 26547 | 24420 | 22391 |
| LGXNEEGAPQ<br>EGILE | 13307 | 19502 | 28821 | 18873 | 27090 | 24492 | 21734 |
| GXNEEGAPQE<br>GILED | 14243 | 20478 | 29929 | 20155 | 28039 | 25138 | 21935 |
| XNEEGAPQEGI<br>LEDM | 12373 | 18429 | 28174 | 17973 | 25842 | 21787 | 18230 |
| NEEGAPQEGIL<br>EDMP | 12780 | 18796 | 28586 | 18158 | 25806 | 21113 | 17930 |
| EEGAPQEGILE<br>DMPV | 8608  | 14819 | 25606 | 12705 | 21142 | 13695 | 11439 |

|                          |       |       |       |       |       |       |       |
|--------------------------|-------|-------|-------|-------|-------|-------|-------|
| EGAPQEGILED<br>MPVD      | 7681  | 13570 | 24221 | 10575 | 19725 | 11594 | 9717  |
| GAPQEGILED<br>PVDP       | 6395  | 11466 | 21206 | 6711  | 14892 | 8606  | 7271  |
| APQEGILED<br>VDPD        | 6212  | 10849 | 20732 | 5543  | 12817 | 7128  | 6029  |
| PQEGILED<br>MPV<br>DPDN  | 5901  | 10385 | 20426 | 4813  | 11757 | 6064  | 5288  |
| QEGILED<br>MPVD<br>PDNE  | 5986  | 10570 | 20669 | 4752  | 11657 | 5965  | 5243  |
| EGILED<br>MPVDP<br>DNEA  | 6790  | 11396 | 21467 | 5001  | 12048 | 6305  | 5448  |
| GILED<br>MPVDPD<br>NEAY  | 7797  | 12806 | 22416 | 5319  | 12440 | 6717  | 6053  |
| ILED<br>MPVDPD<br>EAYE   | 10766 | 15303 | 24848 | 7819  | 15563 | 9455  | 8371  |
| LED<br>MPVDPD<br>EAYEM   | 14159 | 18818 | 26586 | 9247  | 18839 | 12837 | 11373 |
| ED<br>MPVDPD<br>NEAYEMP  | 16494 | 21753 | 27899 | 11411 | 21697 | 16458 | 14367 |
| DMP<br>VDPD<br>NEAYEMPS  | 16539 | 22237 | 28104 | 11855 | 22335 | 17286 | 15071 |
| MPV<br>DPD<br>NEAYEMPSE  | 16874 | 22244 | 28503 | 12534 | 22803 | 18527 | 15306 |
| PV<br>DPD<br>NEAYEMPSEE  | 18523 | 23185 | 29769 | 15998 | 25707 | 22584 | 16226 |
| VDP<br>DNEAYEMP<br>PSEEG | 14176 | 21490 | 29900 | 13562 | 25286 | 19379 | 14140 |
| DPD<br>NEAYEMP<br>SEEGY  | 8208  | 18303 | 27075 | 8827  | 22458 | 15424 | 10071 |
| PD<br>NEAYEMP<br>SEEGYQ  | 6711  | 16702 | 25668 | 7312  | 20825 | 13523 | 8592  |
| DNEAYEMP<br>SEEGYQD      | 7727  | 17638 | 26240 | 7700  | 21319 | 14275 | 9050  |
| NEAYEMP<br>SEEGYQDY      | 6571  | 16680 | 25240 | 6875  | 20406 | 12904 | 7984  |
| EAYEMP<br>SEEGYQDYE      | 7697  | 18381 | 26820 | 8195  | 22188 | 14462 | 9382  |
| AYEMP<br>SEEGYQDYEP      | 9909  | 20663 | 28550 | 10751 | 24681 | 16940 | 11619 |
| YEMP<br>SEEGYQDYEPE      | 15992 | 24332 | 31415 | 16224 | 27562 | 21692 | 16014 |
| EMP<br>SEEGYQDYEPEA      | 20360 | 25836 | 32680 | 19012 | 27762 | 23729 | 18181 |

**Supplementary Table 7. Samples Quality Control – Discovery cohort.**

| Quality control step                   | NIH-GWAS   |            | NIH-NeuroX |            | UCSF-<br>GeneMSA |
|----------------------------------------|------------|------------|------------|------------|------------------|
|                                        | Cases      | Controls   | Cases      | Controls   | Controls         |
| <b>Pre-QC dataset</b>                  | <b>779</b> | <b>675</b> | <b>842</b> | <b>634</b> | <b>331</b>       |
| <b>HLA sequencing rate (&lt; 100%)</b> | -0         | -0         | -0         | -0         | -0               |
| <b>SNP data unavailable</b>            | -0         | -0         | -0         | -0         | -0               |
| <b>Non-White (Self-identification)</b> | -13        | -4         | -6         | -17        | -6               |
| <b>SNP Genotyping Rate (&lt; 90%)</b>  | -0         | -0         | -0         | -0         | -0               |
| <b>Genetic outliers</b>                | -5         | -4         | -0         | -1         | -2               |
| <b>Post-QC dataset</b>                 | <b>761</b> | <b>667</b> | <b>836</b> | <b>616</b> | <b>323</b>       |

Pre-QC dataset consists of sequenced sample data that were received back from the Stanford Genome Technology Center: Genetic outliers are PC-based genetic outliers using the NIH/UCSF population only (removing all population specific outliers at greater than 6 standard deviations from the mean for any of the first 10 principal components).

**Supplementary Table 8. Samples Quality Control – Replication cohort.**

| Quality control step                   | MJFF - BioFIND |           | MJFF - DATATOP | UCSF1      |
|----------------------------------------|----------------|-----------|----------------|------------|
|                                        | Cases          | Controls  | Cases          | Controls   |
| <b>Pre-QC dataset</b>                  | <b>120</b>     | <b>93</b> | <b>451</b>     | <b>386</b> |
| <b>HLA sequencing rate (&lt; 100%)</b> | -2             | -0        | -16            | -0         |
| <b>Non-White (Self-identification)</b> | -9             | -14       | -8             | -3         |
| <b>Post-QC dataset</b>                 | <b>109</b>     | <b>79</b> | <b>427</b>     | <b>383</b> |

Pre-QC dataset consists of sequenced sample data that were received back from the Stanford Genome Technology Center

**Supplementary Table 9. Demographics of the datasets used in the study.**

|                                | Discovery datasets |                |                |                |                  | Replication datasets |            |                  |                |
|--------------------------------|--------------------|----------------|----------------|----------------|------------------|----------------------|------------|------------------|----------------|
|                                | NIH-GWAS           |                | NIH-NeuroX     |                | UCSF-<br>GeneMSA | MJFF-BioFind         |            | MJFF-<br>DATATOP | UCSF1          |
|                                | Cases              | Controls       | Cases          | Controls       | Controls         | Cases                | Controls   | Cases            | Controls       |
| <b>Number of individuals</b>   | 761                | 667            | 836            | 616            | 323              | 109                  | 79         | 427              | 383            |
| <b>Gender (Male/Female)</b>    | 454/307            | 280/387        | 550/286        | 247/369        | 119/204          | 71/38                | 39/40      | 284/143          | 220/163        |
| <b>Age at Sample Mean (SD)</b> | -                  | 58.5<br>(16.4) | -              | 52.0<br>(17.2) | 42.4 (11.0)      | -                    | 65.9 (7.2) | -                | 45.6<br>(13.5) |
| <b>Age at Onset Mean (SD)</b>  | 58.9<br>(13.0)     | -              | 58.9<br>(10.4) | -              | -                | 68.2<br>(6.5)        | -          | 58.8 (9.1)       | -              |

**Supplementary Table 10. SNP Quality Control.**

| Quality control step                      | NIH-GWAS       | NIH-NeuroX                 | UCSF-<br>GeneMSA           |
|-------------------------------------------|----------------|----------------------------|----------------------------|
| <b>Pre-QC dataset</b>                     | <b>453,723</b> | <b>267,607</b>             | <b>553,139</b>             |
| <b>Remove duplicated variants</b>         | 0              | -1,280                     | 0                          |
| <b>HWE (<math>p &lt; 0:001</math>)</b>    | -306           | -610                       | -853                       |
| <b>Call Rate (<math>&lt; 95\%</math>)</b> | -107           | -12,711                    | -1,818                     |
| <b>Post-QC dataset</b>                    | <b>453,310</b> | <b>253,381<sup>a</sup></b> | <b>550,486<sup>b</sup></b> |

HWE: Hardy-Weinberg Equilibrium

<sup>a</sup> 375 SNPs were removed because of quality controls on both HWE and call-rate

<sup>b</sup> 18 SNPs were removed because of quality controls on both HWE and call-rate

**Supplementary Figure 1. Population stratification analysis on NIH/UCSF samples.**

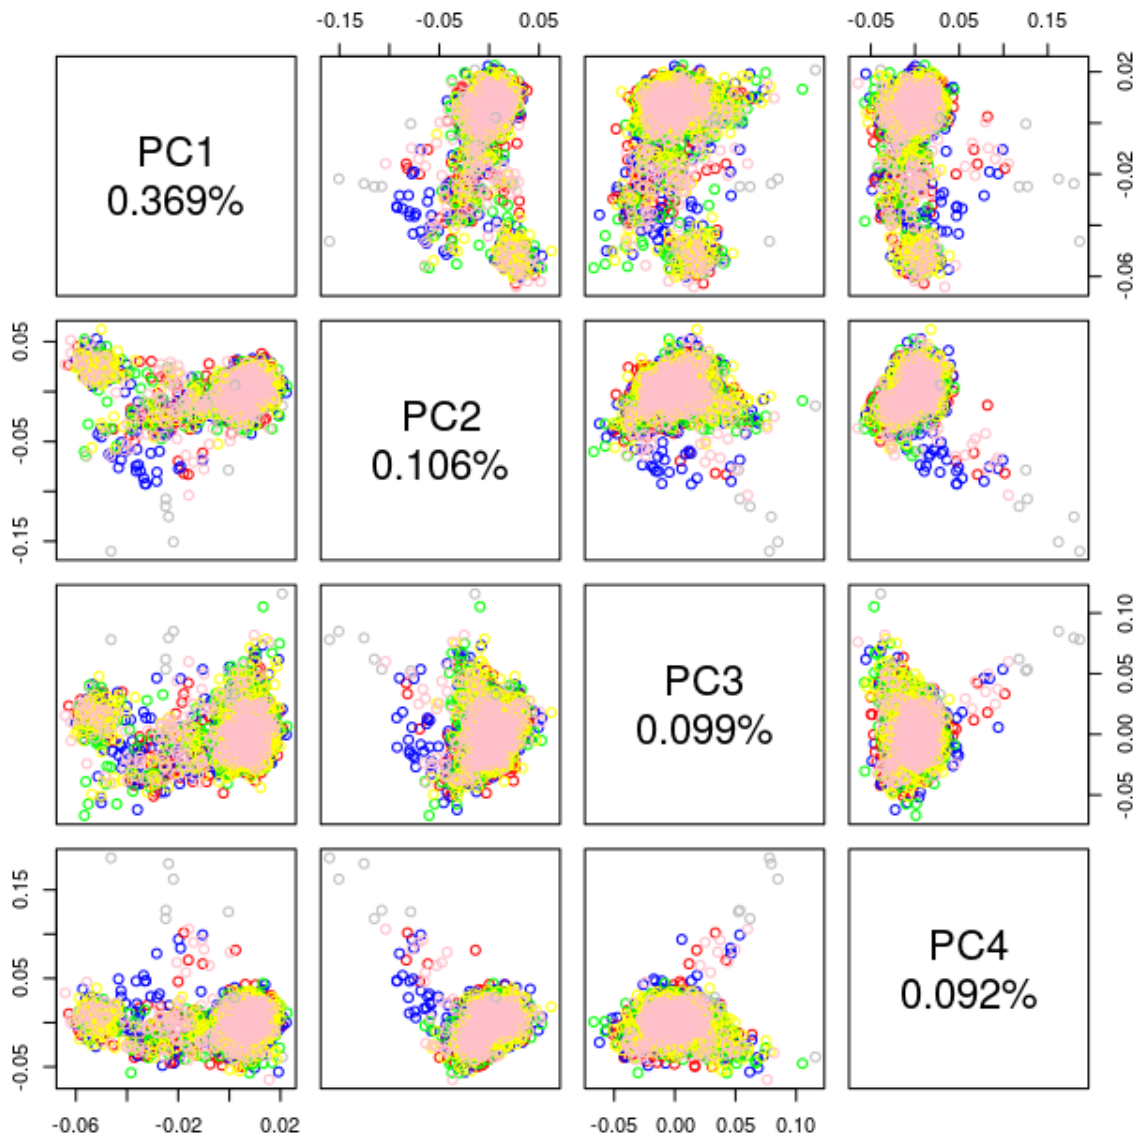

Principal components were computed using a core set of 8,004 SNPs in NIH-GWAS, NIH-NeuroX and UCSF-GenemSA datasets.

Controls samples from NIH-GWAS dataset are colored in red.

Cases samples from NIH-GWAS dataset are colored in blue.

Controls samples from NIH-NeuroX dataset are colored in green.

Cases samples from NIH-NeuroX dataset are colored in yellow.  
Controls samples from UCSF-GeneMSA dataset are colored in pink.  
Outliers are colored in grey.

**Supplementary Figure 2. Population stratification analysis on NIH/UCSF samples and White 1000 Genomes samples.**

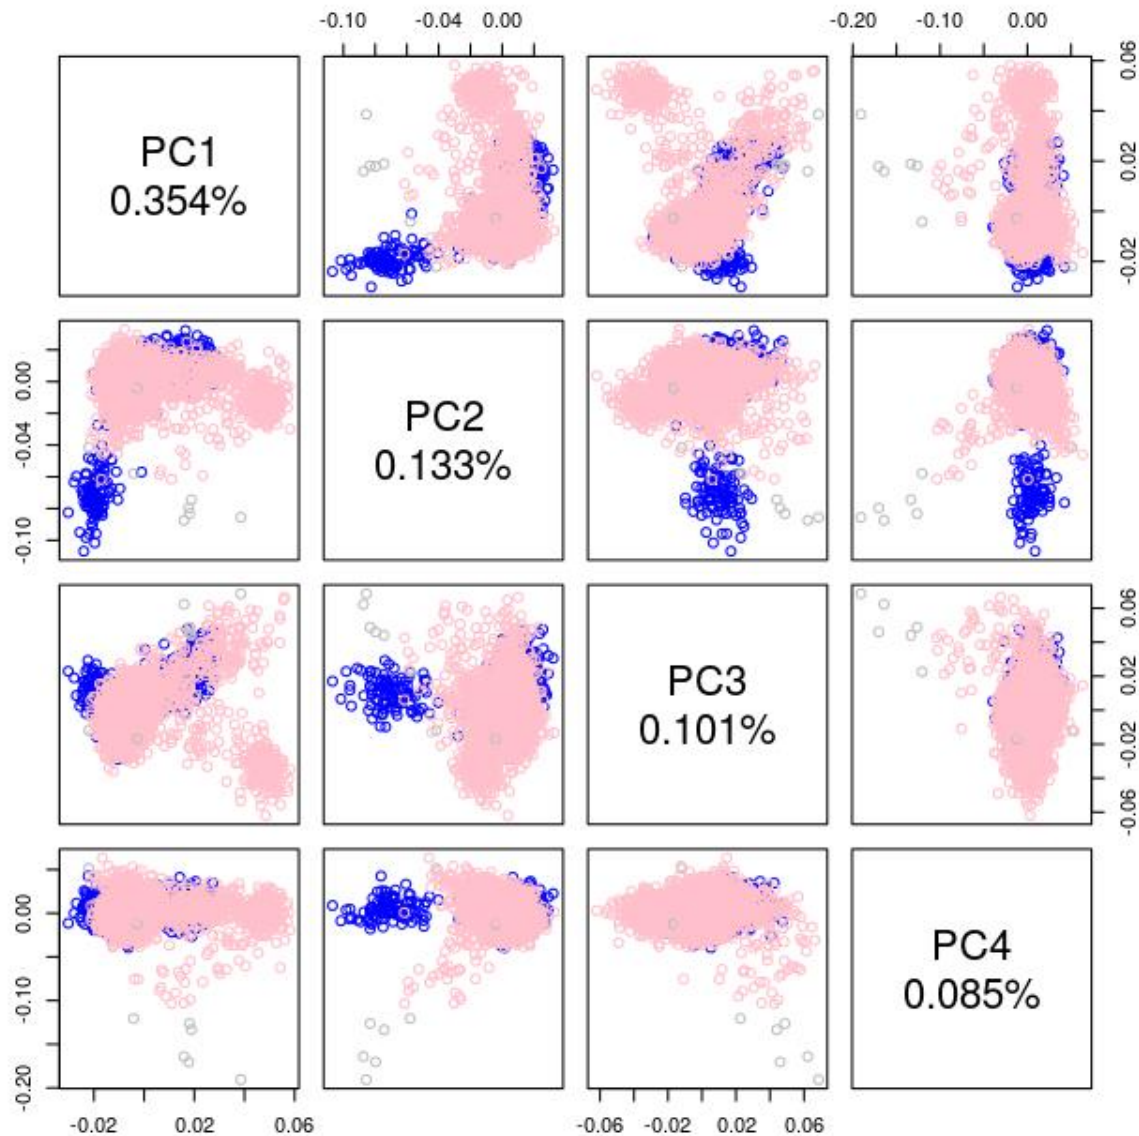

Principal components were computed using a core set of 7,918 SNPs in the NIH-GWAS, NIH-NeuroX and UCSF-GeneMSA datasets and White 1000 Genomes samples.  
NIH/UCSF samples are colored in pink.  
White 1000 genomes samples are colored in blue.  
Outliers are colored in grey.

**Supplementary Figure 3. Population stratification analysis on NIH/UCSF samples.**

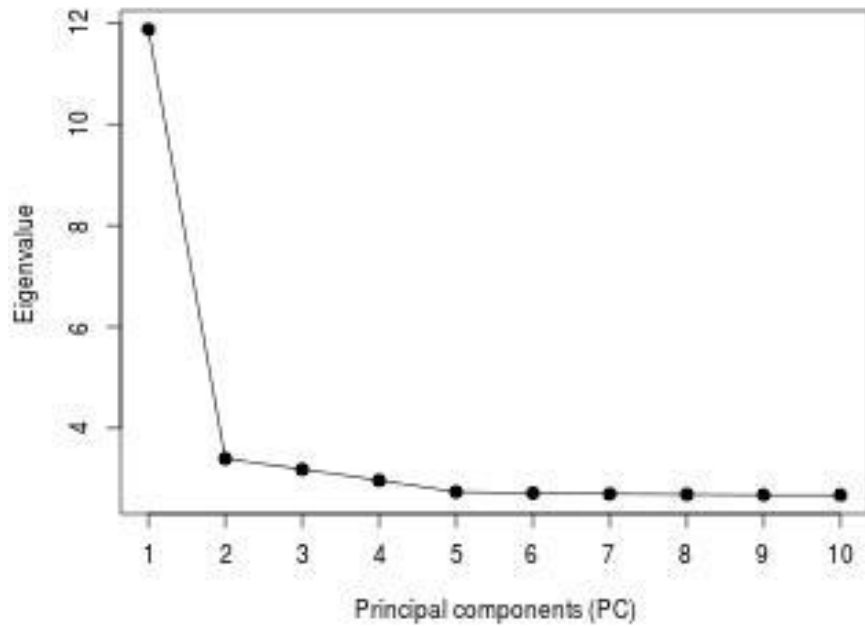

Scree plot of the first ten components of principal component analysis within the NIH/UCSF samples. There was a gap between principal components 4 (PC4) and 5 (PC5).
